# Supplementary material for: Highly efficient perovskite solar cells based on a nanostructured WO3–TiO2core–shell electron transporting material
Source: Royal Society of Chemistry journal article supplement (doi:10.1039/c4ta04883k), 2014-10-01
Supplement: c4ta04883k1.pdf [file c4ta04883k1.pdf]

# **Supporting Information**

## **for**

### **Highly Efficient Perovskite Solar Cells Based on a**

### **Nanostructured WO<sub>3</sub>-TiO<sub>2</sub> Core-Shell Electron**

### **Transporting Material**

**Khalid Mahmood, Bhabani S. Swain, Ahmad R. Kirmani and Aram**

**Amassian\***

#### **1. Experimental Section**

##### **1.1 Deposition of monoclinic WO<sub>3</sub> nanoparticles (NPs) film using electrospray**

The WO<sub>3</sub> film of nanoparticles (NPs) was deposited onto the cleaned fluorine-doped tin oxide (FTO) substrates using the electrospraying method at atmospheric pressure.<sup>S1,S2</sup> The sprayed solution was made by dissolving 1.25 g of tungstic acid (H<sub>2</sub>WO<sub>4</sub>) and 0.5 g poly(vinyl alcohol) (PVA) in 10 mL of 5 wt% hydrogen peroxide (H<sub>2</sub>O<sub>2</sub>) as reported elsewhere.<sup>S3</sup> FTO substrates were cleaned using isopropyl alcohol (IPA), ethanol, acetone and water, respectively. The cleaning process was repeated three times to obtain the well cleaned substrates. The precursor solution was sprayed with a flow rate of 0.003 mL/min, through a small stainless steel nozzle using a syringe pump (KD200, KD Scientific Inc., U.S.A.). To obtain the stable cone-jet mode high voltage of about 5 kV was applied between the nozzle tip and the substrate with the help of a dc power supply (Korea switching, Inc.,

Korea), by keeping a fixed distance of 4.2 cm between these two. In order to completely evaporate the solvent inside the film, substrate was heated upto 160°C before spraying; using a hot plate and solution was sprayed for 80 minutes. The resulting WO<sub>3</sub> films composed of nanoparticles were the annealed in air at 500°C for 1 h.

## **1.2 Hydrothermal growth of monoclinic WO<sub>3</sub> nanorods (NRs) arrays**

In order to accomplish the hydrothermal reaction, the growth solution was prepared as mentioned below and reported elsewhere.<sup>S3</sup> Citric acid (0.96 g) and tungstic acid (0.125 g) were dissolved into the 50 mL of DI water and stirred continuously for about three days in order to obtain the homogeneous solution. The FTO substrates having the electrospray-deposited monoclinic WO<sub>3</sub> NPs film were transferred to an autoclave which contained the above mentioned growth solution with pH of 2.5, adjusted by using a 0.5M NaOH solution. The autoclave was sealed and growth temperature was maintained at 180°C for 12 hours to complete the growth of nanorods. The samples were then taken out and thoroughly washed in DI water, acetone and ethanol to remove the residual salts and finally dried in air at 50°C. The resulting WO<sub>3</sub> nanorod arrays were annealed in air at 500 °C for 1 h.

## **1.3 Hydrothermal growth of monoclinic WO<sub>3</sub> nanosheets (NSs) arrays**

For hydrothermal growth of WO<sub>3</sub> nanosheet arrays, the growth solution was prepared using 0.7 g of oxalic acid and 0.1 g of tungstic acid were dissolved into 50 mL of deionized water followed by a continuously stirring for more than two days in order to prepare the clear and homogeneous solution. The pH of 1.5 of the growth solution was adjusted using a 6 M HCL solution and finally the FTO substrates coated with the electrospray-deposited WO<sub>3</sub> seed layers were placed into the an autoclave having the above mentioned clear solution. The autoclave was heated to 180°C for a full day to grow the WO<sub>3</sub> nanosheet arrays. These were then washed, dried and annealed in air at 500 °C for 1 h.

## 1.4 Perovskite solar cells fabrication

The perovskite solar cells were fabricated with the help of a sequential deposition method reported elsewhere.<sup>S4</sup> Firstly, a very thin and compact layer of monoclinic  $\text{WO}_3$  (act as blocking layer) was prepared using spin coating (2000 rpm for 30 sec) a solution which was made by dissolving 1.25 g  $\text{H}_2\text{WO}_4$  and 0.5 g PVA in 10 mL of 35 wt%  $\text{H}_2\text{O}_2$  on FTO glass, followed by annealing at 500 °C for 1 h in air.  $\text{TiCl}_4$  treatment was applied to the  $\text{WO}_3$  nanostructures in some cases to form a very thin layer of  $\text{TiO}_2$ . To do so, the as-prepared  $\text{WO}_3$  nanostructures were immersed in 40 mM aqueous  $\text{TiCl}_4$  solution at 70°C for 1 h, then rinsed with water and ethanol and sintered at 500 °C for 30 min. After that 1 M  $\text{PbI}_2$  solution was dissolved in DMF while stirring overnight, with constant temperature of 70°C. Then the  $\text{PbI}_2$  solution was spin coated for 5 s at a speed of 6000 rpm onto the as-prepared  $\text{WO}_3$  nanostructures with different morphologies (electrosprayed NP film, vertically grown NRs arrays and NSs arrays) and optionally formed  $\text{TiO}_2$  shell and baked at 70°C for 30 minutes until it dried completely. Samples were subsequently dipped into a solution of  $\text{CH}_3\text{NH}_3\text{I}$  in IPA with concentration of 10 mg/mL for roughly 20 minutes, followed by rinsing in IPA and finally drying at 70°C for 30 minutes. The HTL was prepared by spin coating the spiro-OMeTAD Hole (80 mg of 2,2',7,7'-tetrakis(N,N-di-p-methoxyphenyl-amine)-9,9'-spirobifluorene, 8.4  $\mu\text{L}$  of 4-tert-butylpyridine, and 51.6  $\mu\text{L}$  of bis (trifluoromethane) sulfonamide lithium salt (Li-TFSI) solution (154 mg/ml in acetonitrile), all mixture was dissolved in 1 ml chlorobenzene) solution for 30 s at 3000 rpm. Finally, 90 nm of silver was evaporated on top as the back contact.

## 1.5 Characterization

The nanostructured  $\text{WO}_3$  films and fabricated perovskite solar cells were examined using field emission scanning electron microscopy (FE-SEM, Nova 320), which is coupled with an

X-ray energy dispersive spectrometer (EDXS) DX-4 to confirm the elemental composition of nanostructures. The crystallinity and the presence of conformal coating of TiO<sub>2</sub> on the WO<sub>3</sub> surface were confirmed using TEM images (HRTEM, JEM-3000F, JEOL). The elemental analysis of TiO<sub>2</sub> coated WO<sub>3</sub> nanostructures was performed using high resolution X-ray photoelectron spectroscopy (XPS, Theta Probe XPS Instrument, Thermo Fisher Scientific Co.) with step size 0.1 eV. The crystal structure was obtained using an X-ray diffractometer (XRD; D8 DISCOVER). The current-voltage characteristics of solar cells were achieved with the help of a using a solar simulator (Newport) under steady illumination AM1.5 spectral filter, and the intensity was adjusted to provide 1 sun (100 mW cm<sup>-2</sup>). A forward scan was used with a rate of 1 V/s. The external quantum efficiency (EQE) spectra was measured with the help of EQE measurement system (PV Measurements Inc). Transport properties of solar cells were obtained using transient photocurrent decay and transient photovoltage decay. Diffusion coefficient and time constant for recombination ( $\tau_R$ ) of photo-generated electrons were measured by transient photocurrent-voltage spectroscopy setup, described elsewhere.<sup>S5</sup>

### Supplementary References

- S1. K. Mahmood and S.B. Park, *J. Mater. Chem. A*, 2013, **1**, 4826-4835.
- S2. K. Mahmood, H. W. Kang, S. B. Park and H. J. Sung, *ACS Appl. Mater. Interfaces*, 2013, **5**, 3076.
- S3. J. Su, X. Feng, J. D. Sloppy, L. Guo and C. A. Grimes, *Nano Lett.*, 2011, **11**, 203.
- S4. J. Burschka, N. Pellet, S.-J. Moon, R. Humphry-Baker, P. Gao, M. K. Nazeeruddin and M. Grätzel, *Nature*, 2013, **499**, 316–319.
- S5. H. S. Kim, J. W. Lee, N. Yantara, P. P. Boix, S. A. Kulkarni, S. Mhaisalkar, M. Grätzel and N. G. Park, *Nano Lett.*, 2013, **13**, 2412–2417.

# Supplementary Figures

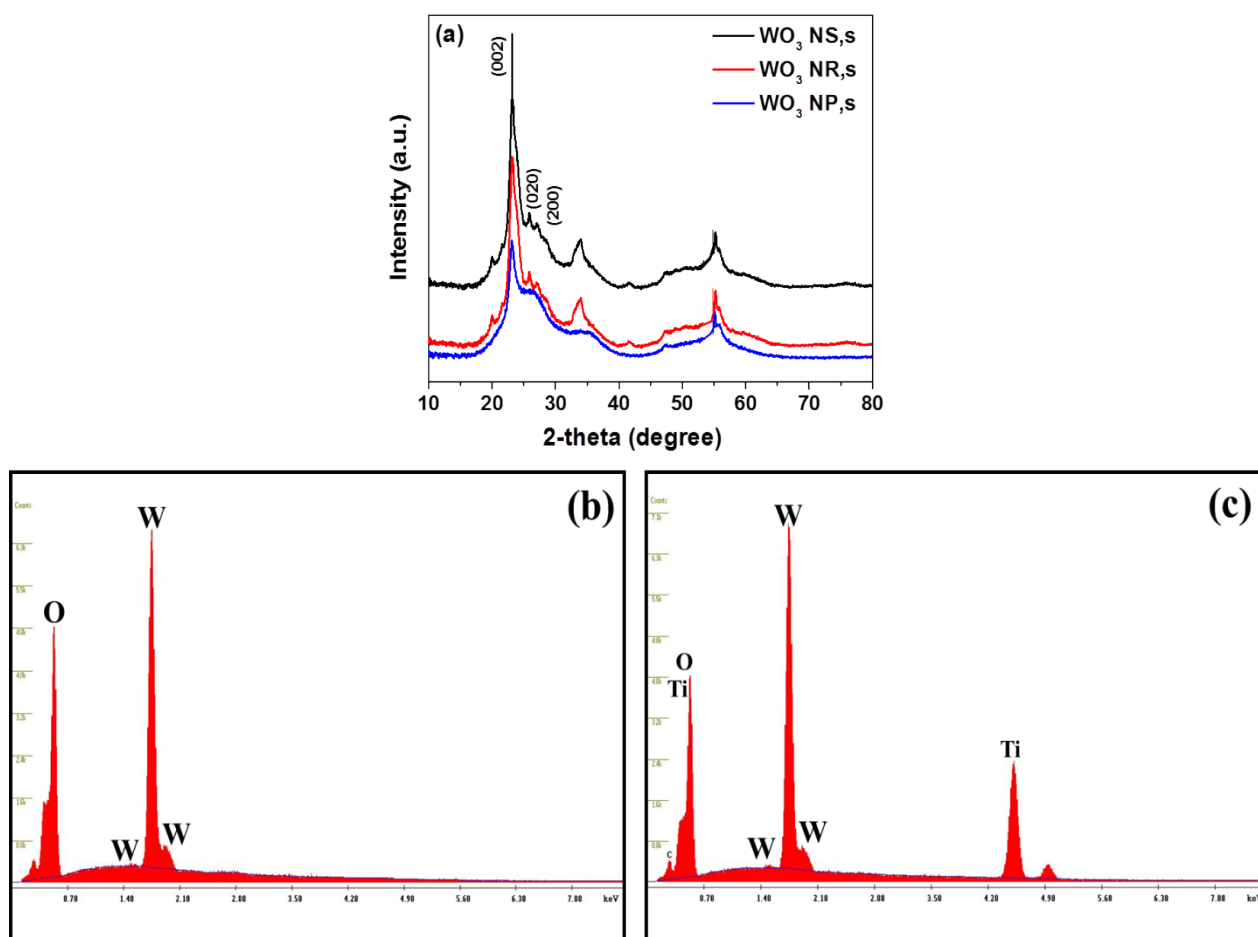

**Figure. S1** (a) Comparison of XRD spectra of monoclinic WO<sub>3</sub> NPs, NRs and NSs, EDS spectra of WO<sub>3</sub> NSs before (b), and after (b) TiCl<sub>4</sub> treatment confirming the coexistence of W, O and Ti for TiO<sub>2</sub> coated WO<sub>3</sub> NS,s arrays.

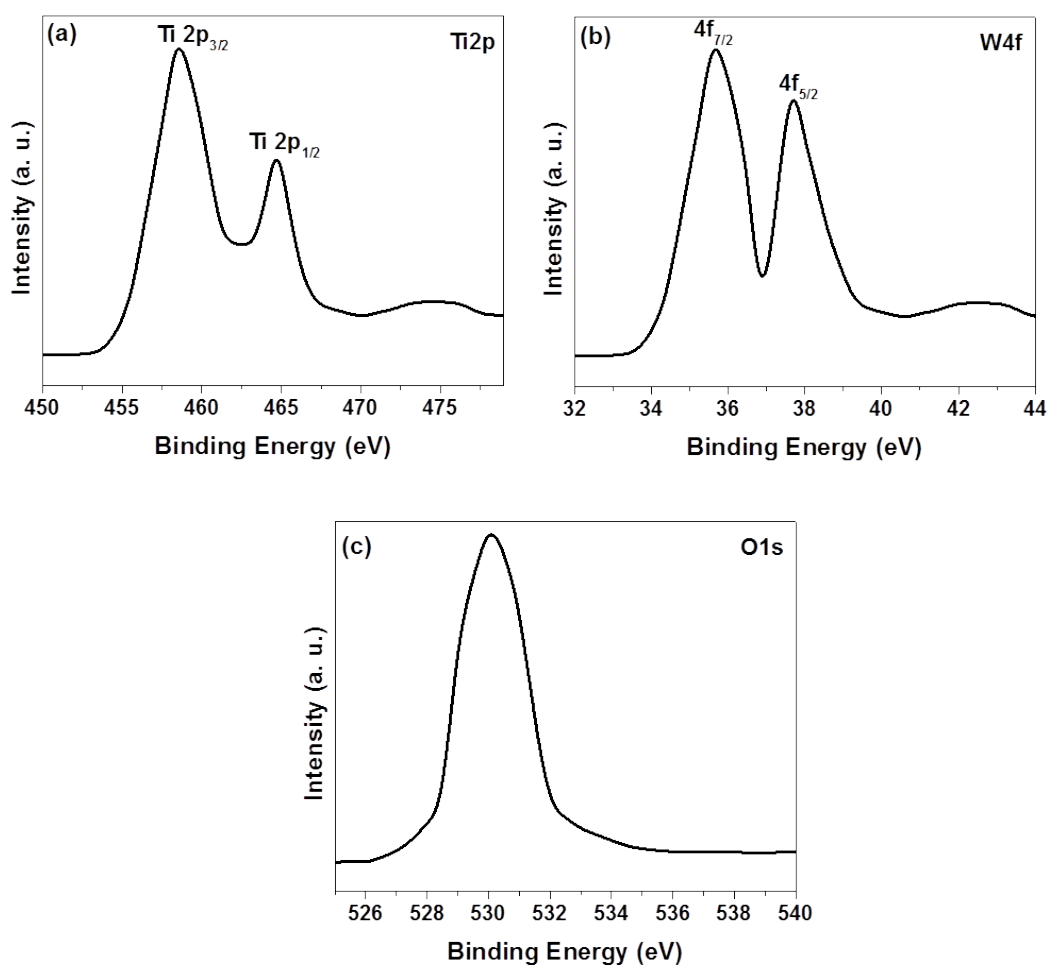

**Figure. S2** XPS spectra of (a) Ti2p, (b) W4f, and (c) O1s obtained from  $\text{TiCl}_4$  treated  $\text{WO}_3$  NSs arrays confirming the existence of  $\text{TiO}_2$  over the surface of pure  $\text{WO}_3$  NSs arrays.
